# Supplementary material for: A surface chemistry-regulated gradient multi-component solid electrolyte interphase for a 460 W h kg−1 lithium metal pouch cell
Source: Royal Society of Chemistry journal article supplement (doi:10.1039/d4ee02311k), 2024-01-01
Supplement: d4ee02311k1.pdf [file d4ee02311k1.pdf]

## Supporting Information

### Surface Chemistry Regulated Gradient Multi-Component Solid

### Electrolyte Interphase for 460 Wh kg<sup>-1</sup> Lithium Metal Pouch Cell

Man Pang<sup>1</sup>, Zhongwei Jiang<sup>1</sup>, Chongyang Luo<sup>1</sup>, Ziqing Yao<sup>1</sup>, Tianji Fu<sup>1</sup>, Tao Pan<sup>1</sup>,  
Qingpeng Guo<sup>1</sup>, Yujie Li<sup>1\*</sup>, Shizhao Xiong<sup>2</sup>, Chunman Zheng<sup>1</sup>, Weiwei Sun<sup>1\*</sup>,  
Guangmin Zhou<sup>3</sup>, Shuangke Liu<sup>1\*</sup>

<sup>1</sup> College of Aerospace Science and Engineering, National University of Defense  
Technology, Changsha, Hunan, 410073, China

<sup>2</sup> Department of Materials Science and Engineering, Kunming University of Science  
and Technology, Kunming, 650093 China

<sup>3</sup> Tsinghua-Berkeley Shenzhen Institute & Tsinghua Shenzhen International Graduate  
School, Tsinghua University, Shenzhen, P. R. China

\* Corresponding author. [liu\\_sk@139.com](mailto:liu_sk@139.com) (Shuangke Liu) [powerlyj@163.com](mailto:powerlyj@163.com) (Yujie  
Li) [wwsun@nudt.edu.cn](mailto:wwsun@nudt.edu.cn) (Weiwei Sun)

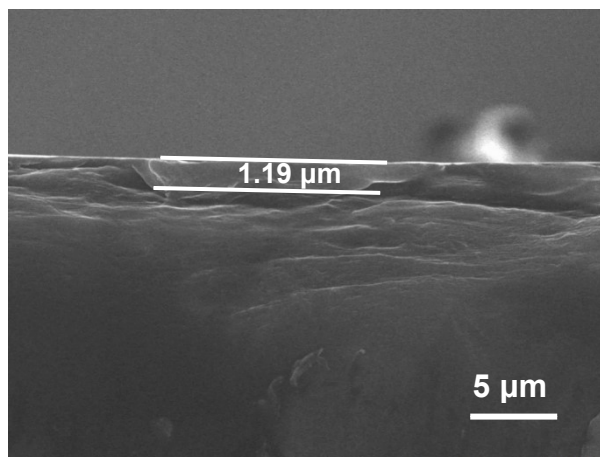

**Fig. S1.** Cross-sectional SEM images of DFFSA-Li.

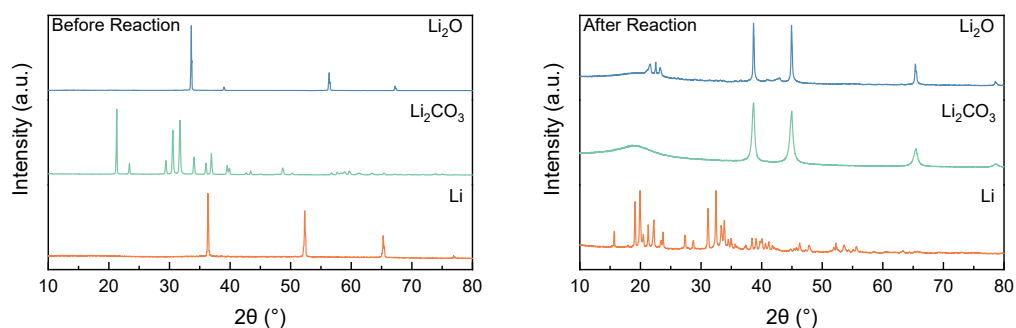

**Fig. S2.** XRD patterns of  $\text{Li}_2\text{O}$ ,  $\text{Li}_2\text{CO}_3$  and  $\text{Li}$  before and after reaction with excess DFFSA.

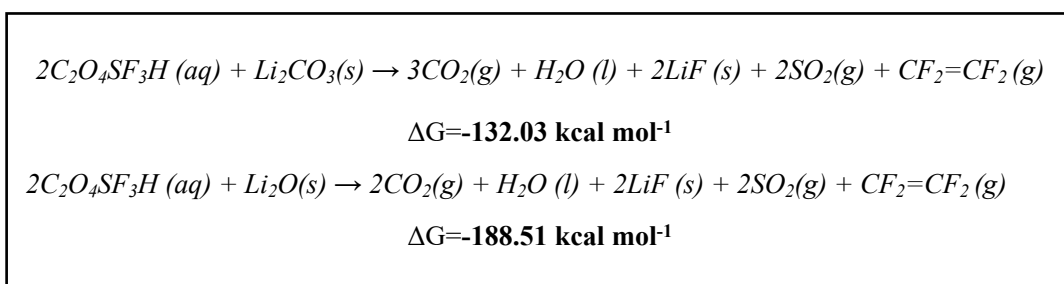

**Fig. S3.** Chemical reaction of DFFSA with  $\text{Li}_2\text{CO}_3$ ,  $\text{Li}_2\text{O}$  and the corresponding calculated Gibbs free energy.

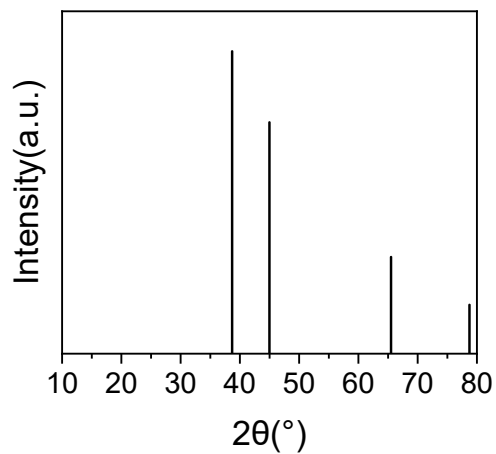

**Fig. S4.** XRD standard card for LiF.

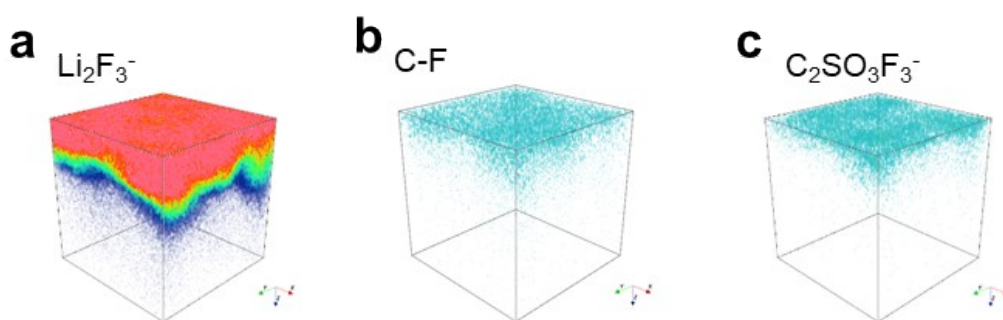

**Fig. S5.** The 3D overlays of the ion fragments of a) Li<sub>2</sub>F<sub>3</sub><sup>-</sup>, b) C-F and c) C<sub>2</sub>SO<sub>3</sub>F<sub>3</sub><sup>-</sup>.

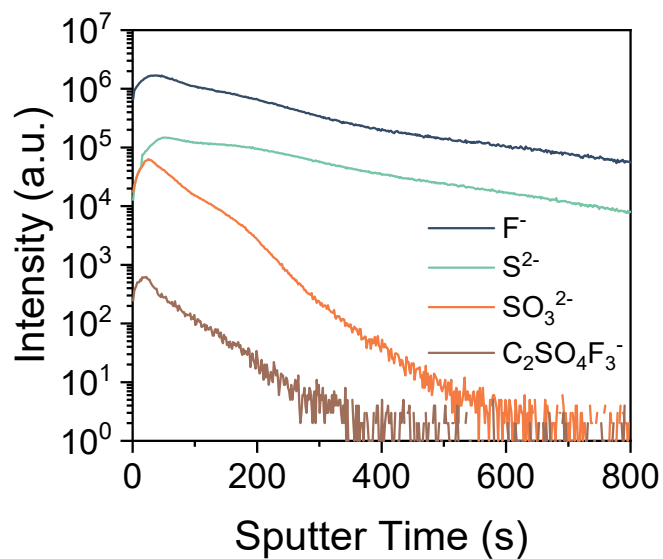

**Fig. S6.** The TOF-SIMS depth sputter curves of DFFSA-Li surface.

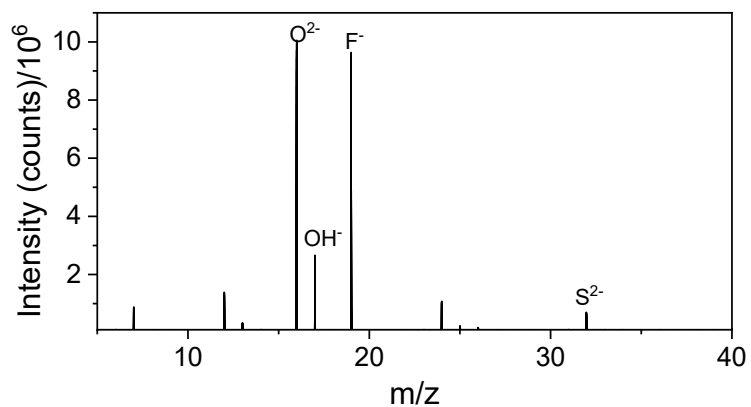

**Fig. S7.** Time-of-flight secondary ion mass spectrum (TOF-SIMS) of the DFFSA-Li anode.

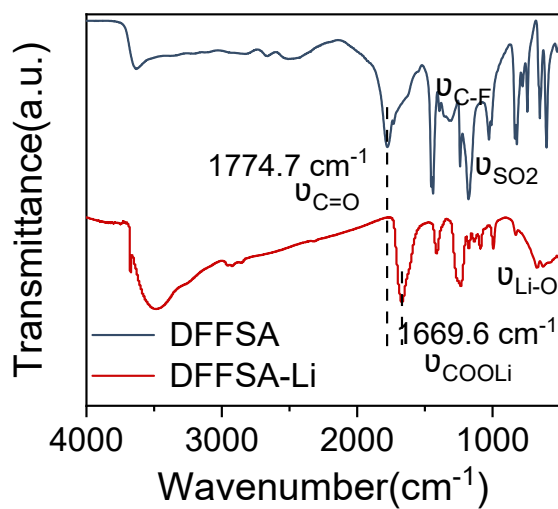

**Fig. S8.** Infrared spectra of DFFSA-Li and DFFSA.

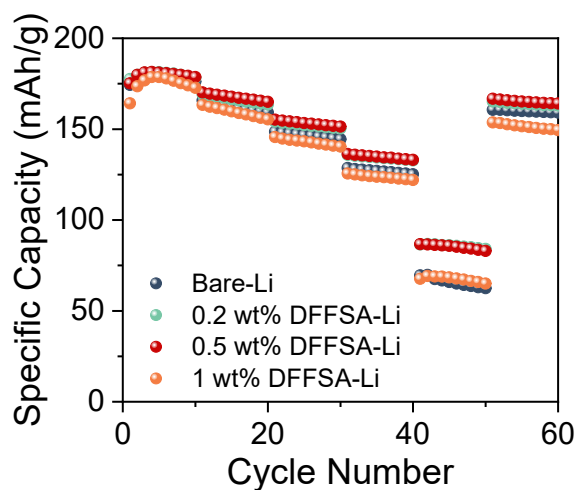

**Fig. S9.** Rate capability of coin cells with DFFSA-Li and Bare-Li for cycling from 0.2 to 5C.

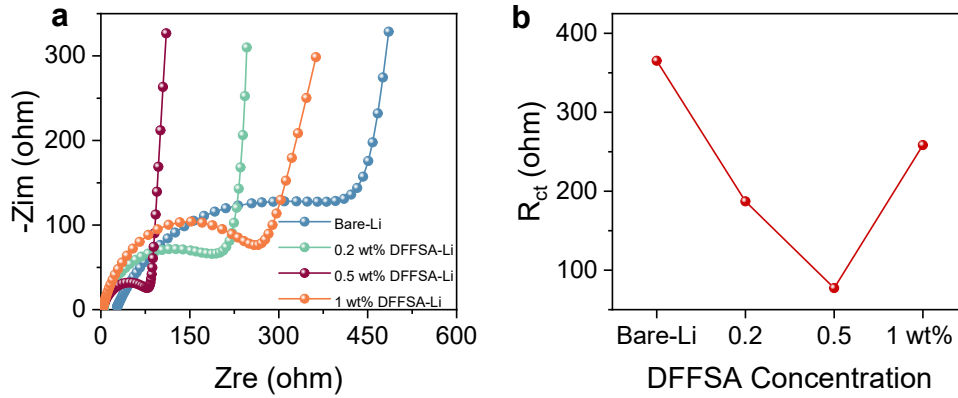

**Fig. S10.** Electrochemical impedance spectroscopy (EIS) tests of the Li||LCO cells with different DFFSA concentration treatment.

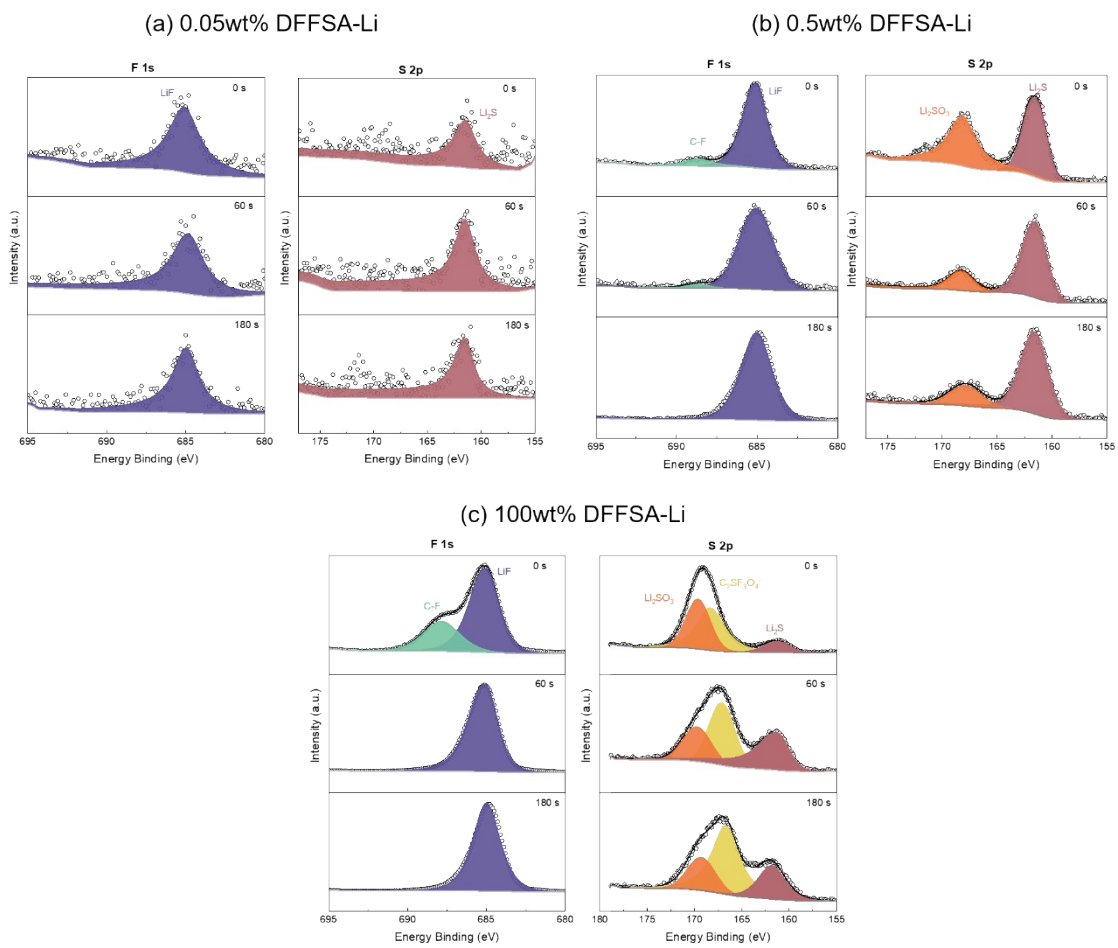

**Fig. S11.** Depth-dependent XPS spectra of different DFFSA concentration treatment.

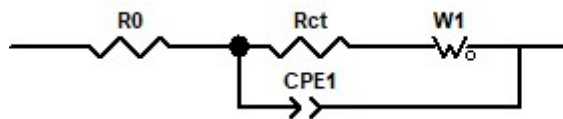

**Fig. S12.** Equivalent circuit diagram of the Li||LCO battery.

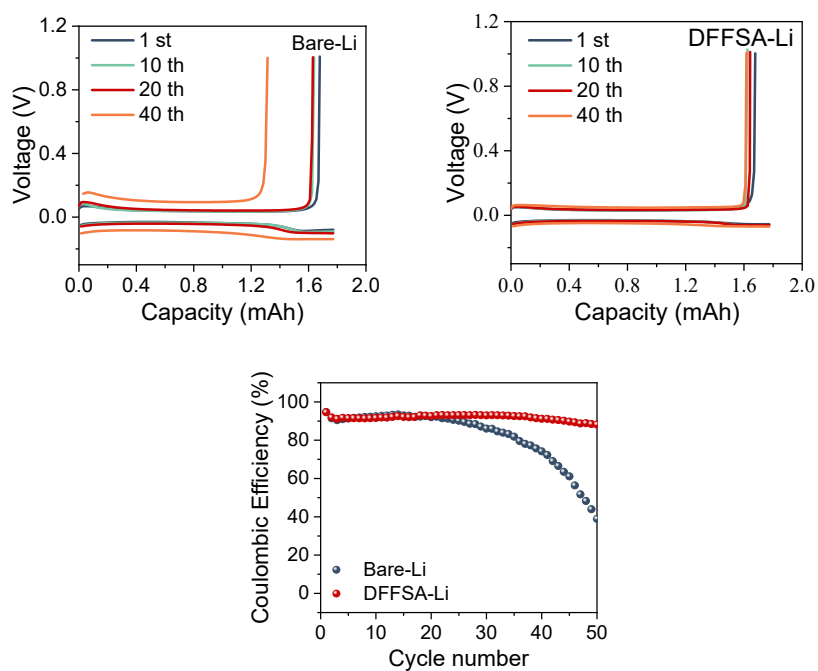

**Fig. S13.** Performance comparison of Bare-Li and DFFSA-Li in Li||Cu batteries.

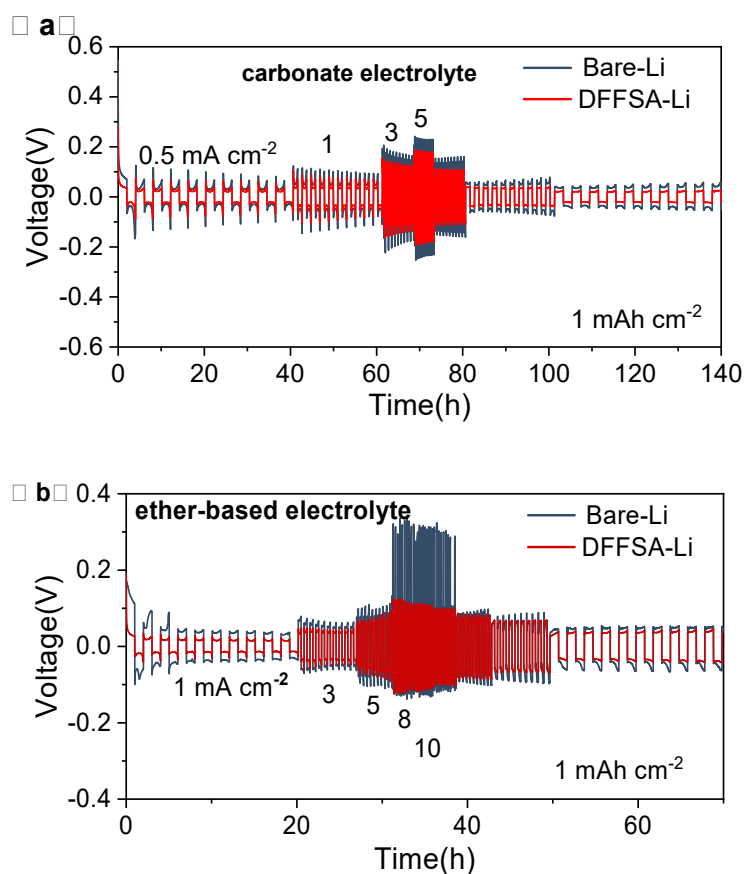

**Fig. S14.** Voltage profiles of the symmetric cells with Li deposition amount of 1 mA h cm<sup>-2</sup> at the current density of 0.5, 1, 3 and 5 mA cm<sup>-2</sup> using (a) carbonate electrolyte 1M LiPF<sub>6</sub> in EC and DEC (v/v = 3:7) with 10% FEC; (b) ether-based electrolyte 1M

LiTFSI in DOL and DME (v/v = 1:1) with 1.0wt% LiNO<sub>3</sub>.

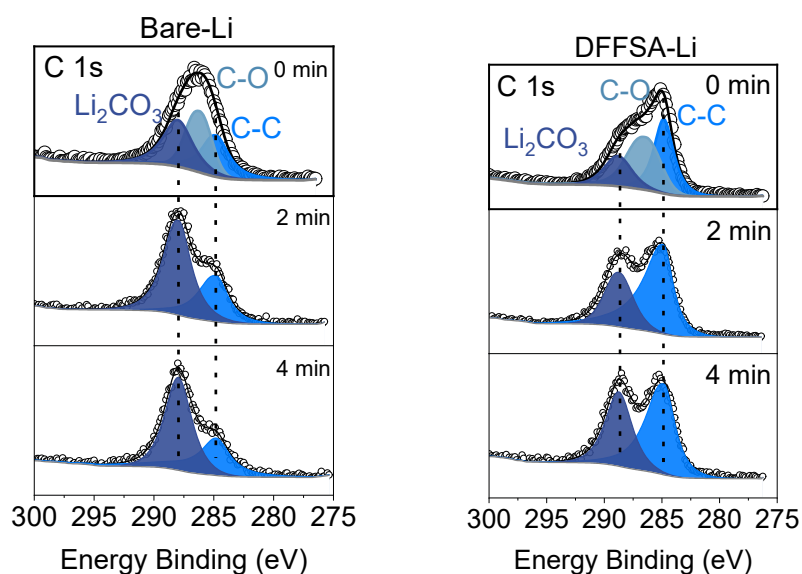

**Fig. S15.** XPS spectra of C 1s of Li||Li symmetric cells after 10 cycles with a) Bare-Li, b) DFFSA-Li.

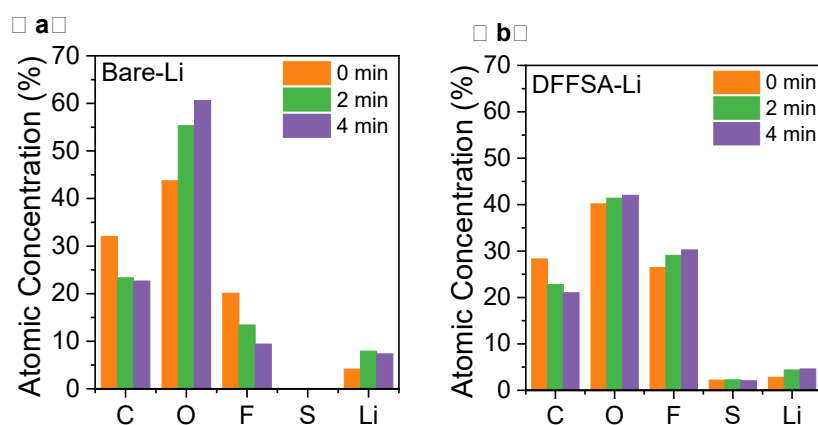

**Fig. S16.** Atomic composition ratios of the SEI obtained by XPS spectra for (a) Bare-Li and (b) DFFSA-Li.

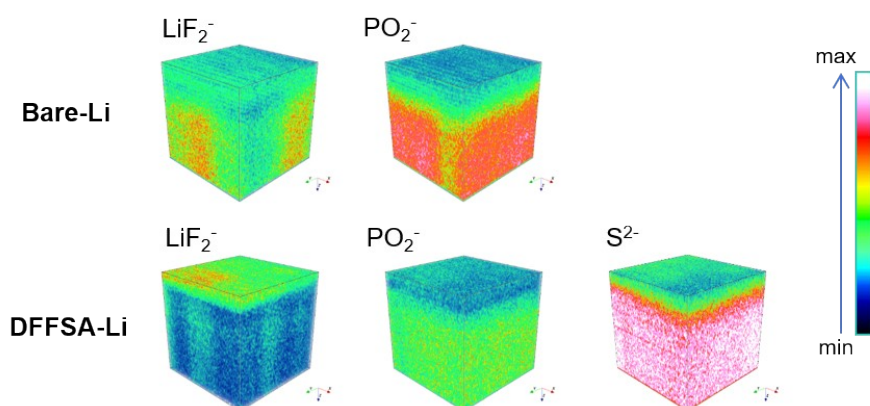

**Fig. S17.** TOF-SIMS results comparisons of LiF<sub>2</sub><sup>-</sup>, PO<sub>2</sub><sup>-</sup> and S<sub>2</sub><sup>-</sup> species in symmetric cells after 10 cycles for Bare-Li and DFFSA-Li anodes.

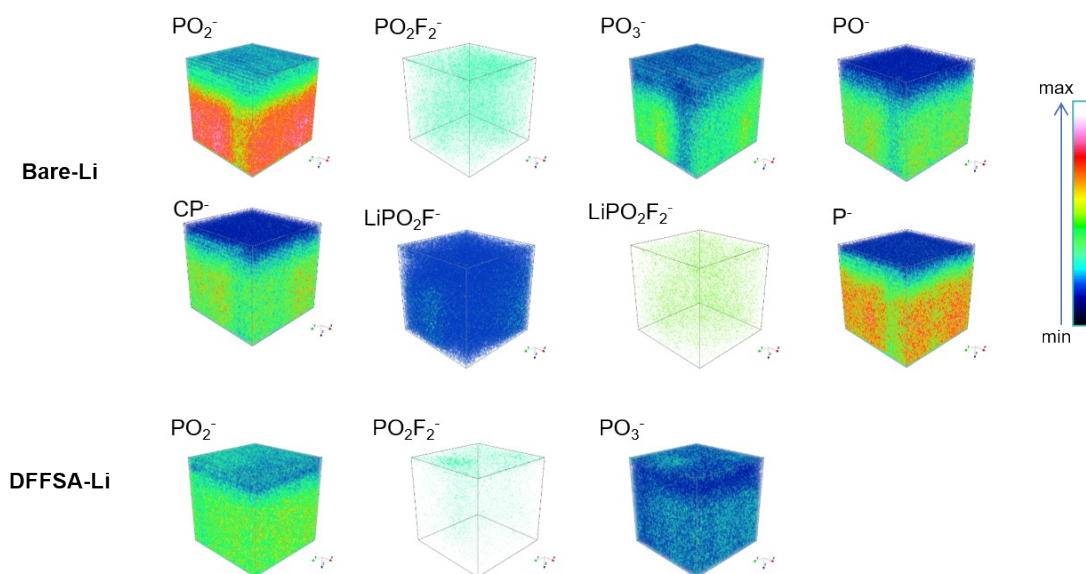

**Fig. S18.** TOF-SIMS results of P-containing species in symmetric cells after 10 cycles for Bare-Li and DFFSA-Li anodes.

**Table S1.** The detailed parameters of the DFFSA-Li||LCO and Bare-Li||LCO pouch cells.

|             |                                      | Cell parameters    |       |          |       |
|-------------|--------------------------------------|--------------------|-------|----------|-------|
| Cathode     | Cathode Materials                    | LiCoO <sub>2</sub> |       |          |       |
|             | Areal density (mg cm <sup>-2</sup> ) | 51.6               | 51.6  | 51.6     | 51.6  |
|             | Proportion of active materials (%)   | 96.34              | 96.34 | 96.34    | 96.34 |
|             | Electrode length (mm)                | 60                 | 60    | 60       | 60    |
|             | Electrode width (mm)                 | 20                 | 20    | 20       | 20    |
|             | LCO wight (mg)                       | 597                | 621   | 651      | 622   |
| Anode       | Anode Materials                      | Bare-Li            |       | DFFSA-Li |       |
|             | Li thickness (μm)                    | 100                | 50    | 100      | 50    |
|             | N/P ratio                            | 2.24               | 1.12  | 2.24     | 1.12  |
| Electrolyte | Weight (g)                           | 0.5                | 0.5   | 0.5      | 0.5   |



**Table S2.** The detailed parameters of a high-energy DFFSA-Li||NCM811 pouch cell.

| Cell component | Cell parameters                                  | Value    |
|----------------|--------------------------------------------------|----------|
| Cathode        | Materials                                        | NCM811   |
|                | Area weight (each side, mg cm <sup>-2</sup> )    | 19.5     |
|                | Area capacity (each side, mAh cm <sup>-2</sup> ) | 3.9      |
|                | Electrode length (mm)                            | 69       |
|                | Electrode width (mm)                             | 51       |
|                | NCM811 weight (g)                                | 1.34     |
|                | The weight of Al foil + NCM811 (g)               | 1.5      |
|                | Number                                           | 20       |
| Anode          | Materials                                        | DFFSA-Li |
|                | Number                                           | 21       |
|                | Li thickness (double side, μm)                   | 50       |
|                | Area capacity (each side, mAh cm <sup>-2</sup> ) | 5        |
|                | N/P ratio                                        | 1.28     |
| Electrolyte    | E/C ratio (g/Ah)                                 | 1.6      |
|                | Weight (g)                                       | 8.78     |
| Pouch cell     | Total weight (g)                                 | 47.29    |
|                | Theoretical capacity (Ah)                        | 5.49     |
|                | First circulating capacity (Wh)                  | 21.84    |
|                | Energy density (Wh/kg)                           | 461.6    |

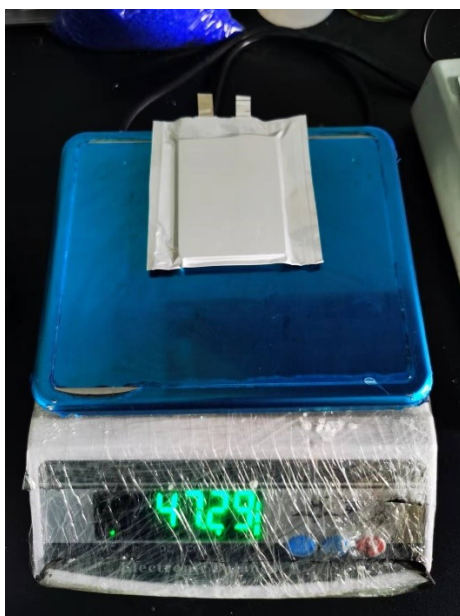

**Fig. S19.** The weighing mass of the DFFSA-Li||NCM811 pouch cell.
